# Supplementary material for: Extensive Decoupling of Metabolic Genes in Cancer
Source: PLOS journal article supplement (doi:10.1371/journal.pcbi.1004176), 2015-05-11

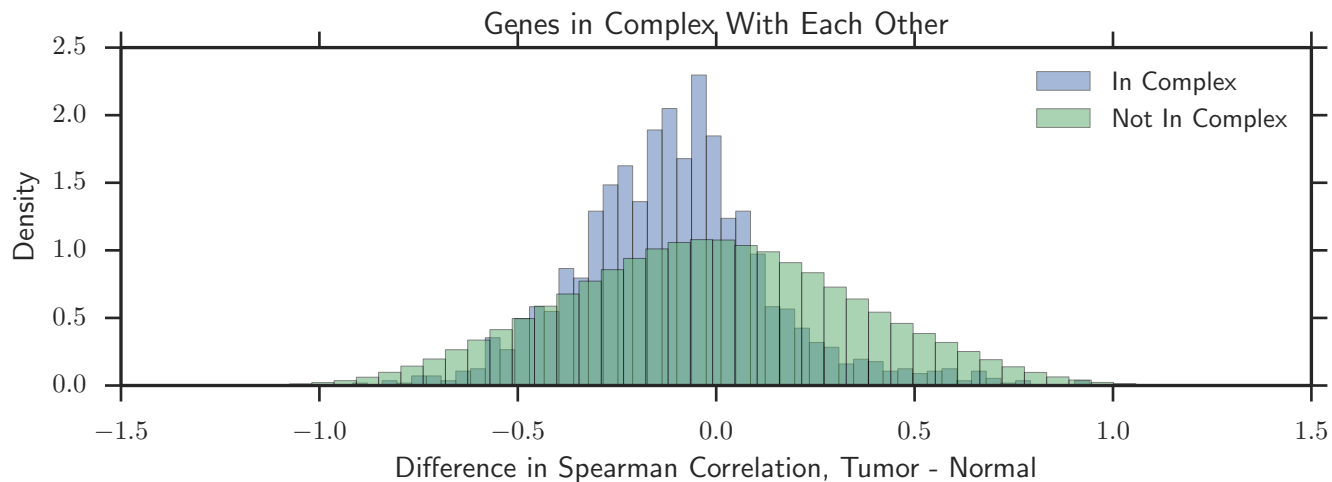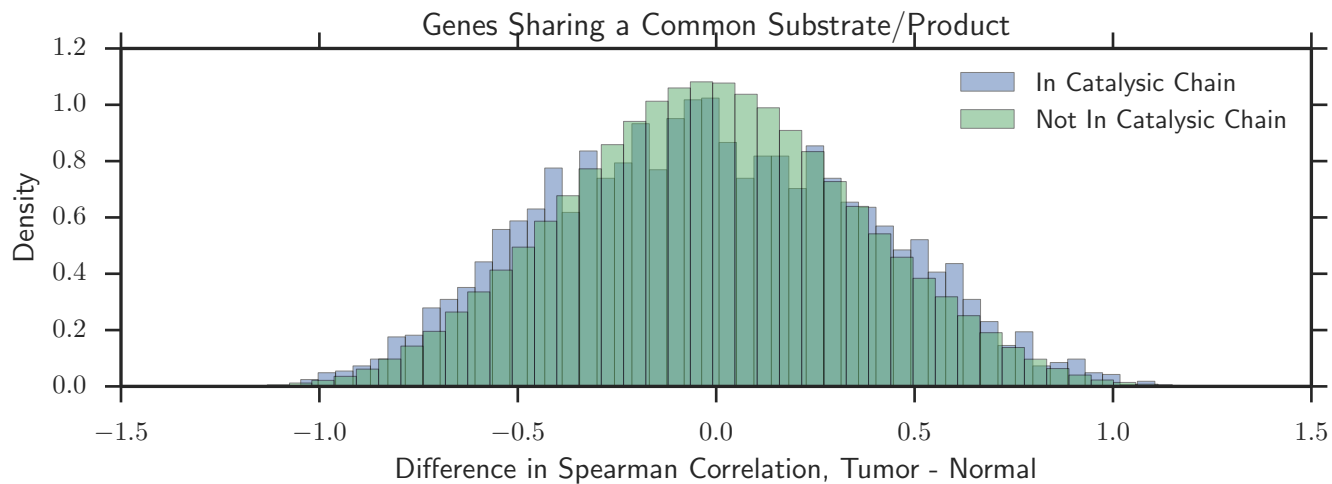

Supplement: S4 (10.1371/journal.pcbi.1004176.s004) [file journal.pcbi.1004176.s004]
